# Supplementary material for: ALKBH5 Stabilized N6-Methyladenosine—Modified LOC4191 to Suppress E. coli-Induced Apoptosis
Source: MDPI journal article supplement (doi:10.3390/cells12222604), 2023-11-10
Supplement: s1 [file s1]

Table S1. Related primer sequences

| gene    | Primers Sequence (5'→3')    |                           |
|---------|-----------------------------|---------------------------|
| β-actin | F: TGCTGTCCCTGTATGCCTCT     | R: GGTCTTTACGGATGTCAACG   |
| IL-1β   | F: TTCCATATTCCTCTGGGGTAGA   | R: AAATGAACCGAGAAGTGGTGTT |
| IL-6    | F: CAGCAGGTCAAGTGTGTTGTGG   | R: CTGGGTTCAATCAGGCGAT    |
| TNF-α   | F: CTTCTCAAGCCTCAAGTAACAAGC | R: CCATGAGGGCATTGGCATAAC  |
| METTL3  | F: GGAACACTGCTTGGTTGGTG     | R: GGTTGCACATTGTGTGGTCG   |
| METTL14 | F: TTGGAGCAAGGGTTCATCCG     | R: CACTTTCAGCTCCCAACTGC   |
| WTAP    | F: CTCCGTCTGGAGAGGATTCA     | R: CTGCGTGCAGATTCTTGCTG   |
| ALKBH5  | F: CCCATCCACATCTTCGAGCG     | R: AGCAGCGTATCCACTGAGCAC  |
| FTO     | F: CTCCGTCTGGAGAGGATTCA     | R: TGCTCCTTGGTTGCTAGTCG   |
